# Supplementary material for: Phenotypic plasticity under rapid global changes: The intrinsic force for future seagrasses survival
Source: PubMed Central journal article supplement (PMC8127715; doi:10.1111/eva.13212), 2021-04-04
Supplement: EVA-14-1181-s002.pdf [file EVA-14-1181-s002.pdf]

**Table S1.** Glossary of main terminology and definitions

|                                           |                                                                                                                                                                                                                                                                                                                     |
|-------------------------------------------|---------------------------------------------------------------------------------------------------------------------------------------------------------------------------------------------------------------------------------------------------------------------------------------------------------------------|
| <b>Phenotype</b>                          | The expression of a trait as a result of both genetic and environmental changes.                                                                                                                                                                                                                                    |
| <b>Genotype</b>                           | The genetic makeup (i.e. complete genome) of a single organism.                                                                                                                                                                                                                                                     |
| <b>Adaptive phenotype</b>                 | <a href="#">The phenotype</a> resulting from long-evolutionary mechanisms that allows organisms to optimally respond to environmental changes                                                                                                                                                                       |
| <b>Non-adaptive phenotype</b>             | <a href="#">The phenotype</a> resulting from long evolutionary mechanisms that is not optimal for the new environment                                                                                                                                                                                               |
| <b>Reaction norm</b>                      | <a href="#">The function</a> which describe a curve that relates the environment to a phenotype resulting from the interaction between a particular genotype and the environment. Different shapes of this function describe the degree of plasticity of a single genotype across the environment.                  |
| <b>Acclimation</b>                        | <a href="#">The ability</a> of a single organism to adjust its morphology and physiology to environmental changes. This process occurs in short time improving performances in a changing environment. The degree of acclimation is closely related to phenotypic plasticity or the range tolerance of an organism. |
| <b>Epigenetic <a href="#">changes</a></b> | <a href="#">The modifications</a> occurring at DNA level without altering DNA sequence. Epigenetic marks includes DNA methylation (DNA base modification through the addition of a methyl group) and histone modifications that alter DNA accessibility and chromatin structure.                                    |
| <b>Epigenetic plasticity</b>              | Epigenetic modifications induced by environmental cues with the ability of reprogramming gene expression. In the case of environmental shifts, these modifications trigger <a href="#">the expression</a> of new phenotypes that can <a href="#">or cannot be</a> advantageous.                                     |
| <b>Assisted evolution</b>                 | <a href="#">Active intervention to accelerate the rate of naturally occurring evolutionary processes, including the selection</a> of highly plastic                                                                                                                                                                 |

Elimi

genotypes, hardening and genetic manipulation, in order to improve performances under rapid environmental changes.

Elimi

## Stress memory

The ability to “remember” past stressful events. The capacity of plants submitted to a stress exposure to store information and to better respond to a new stress.
